# Supplementary material
Source: Springer Nature journal article supplement (https://www.springermedizin.de/resource/supplementary/12885_2014_4739_MOESM7_ESM.pdf/9467152)

**A**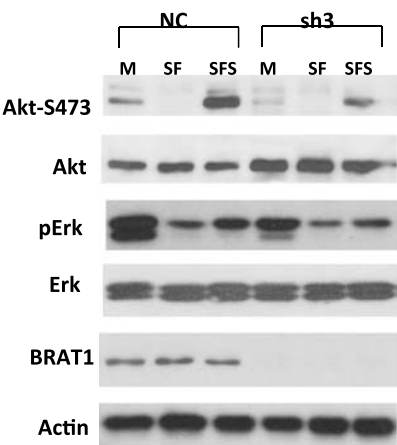**B**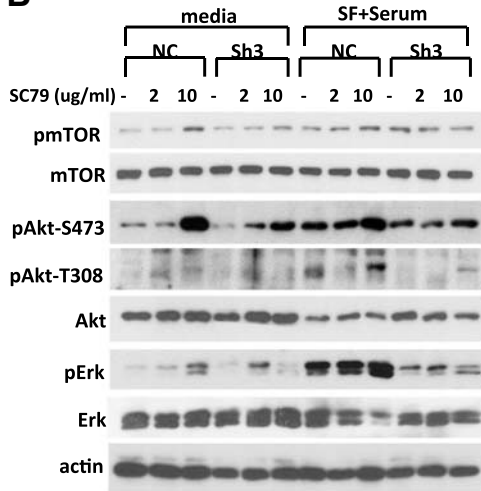**C**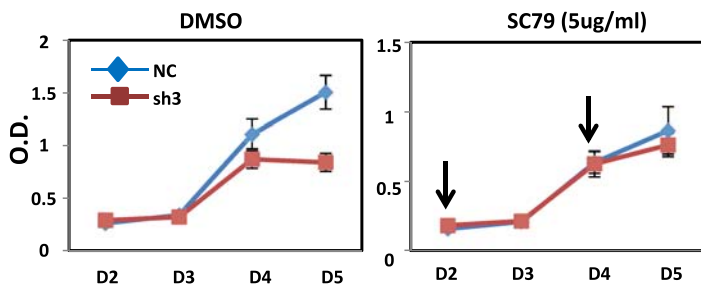**D**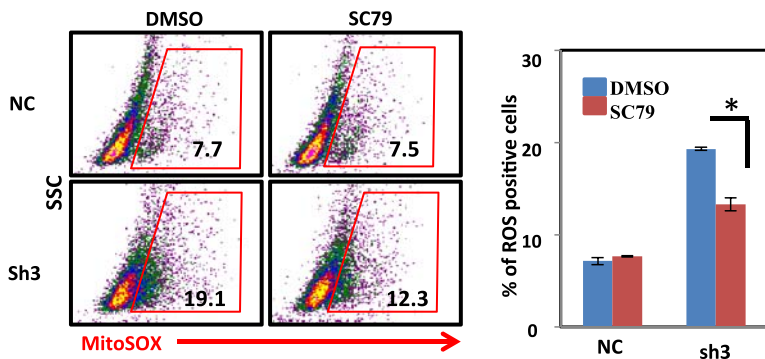

Supplement: MOESM7 [file 9467152]
